# Supplementary material
Source: publisher site journal article supplement (https://www.dovepress.com/get_supplementary_file.php?f=393118.docx)
Supplement: Supplementary file 1 [file get_supplementary_file.php]

***Supplementary Material***

**Effects of curative-intent treatments on hepatocellular carcinoma survival in alcohol-related cirrhosis: a nationwide study**

Frederik Kraglund1, Gerda Elisabeth Villadsen1, Peter Jepsen1, 2

1 Department of Hepatology and Gastroenterology, Aarhus University Hospital, Aarhus, Denmark

2 Department of Clinical Epidemiology, Aarhus University Hospital, Aarhus, Denmark

Table of contents

[Supplementary Fig. S1. 2](#_Toc104976588)

[Supplementary Fig. S2 3](#_Toc104976589)

[Supplementary Table S1 4](#_Toc104976590)

[Supplementary Table S2 5](#_Toc104976591)

Supplementary Figure S1. Overall (crude) survival in by resection and ablation**
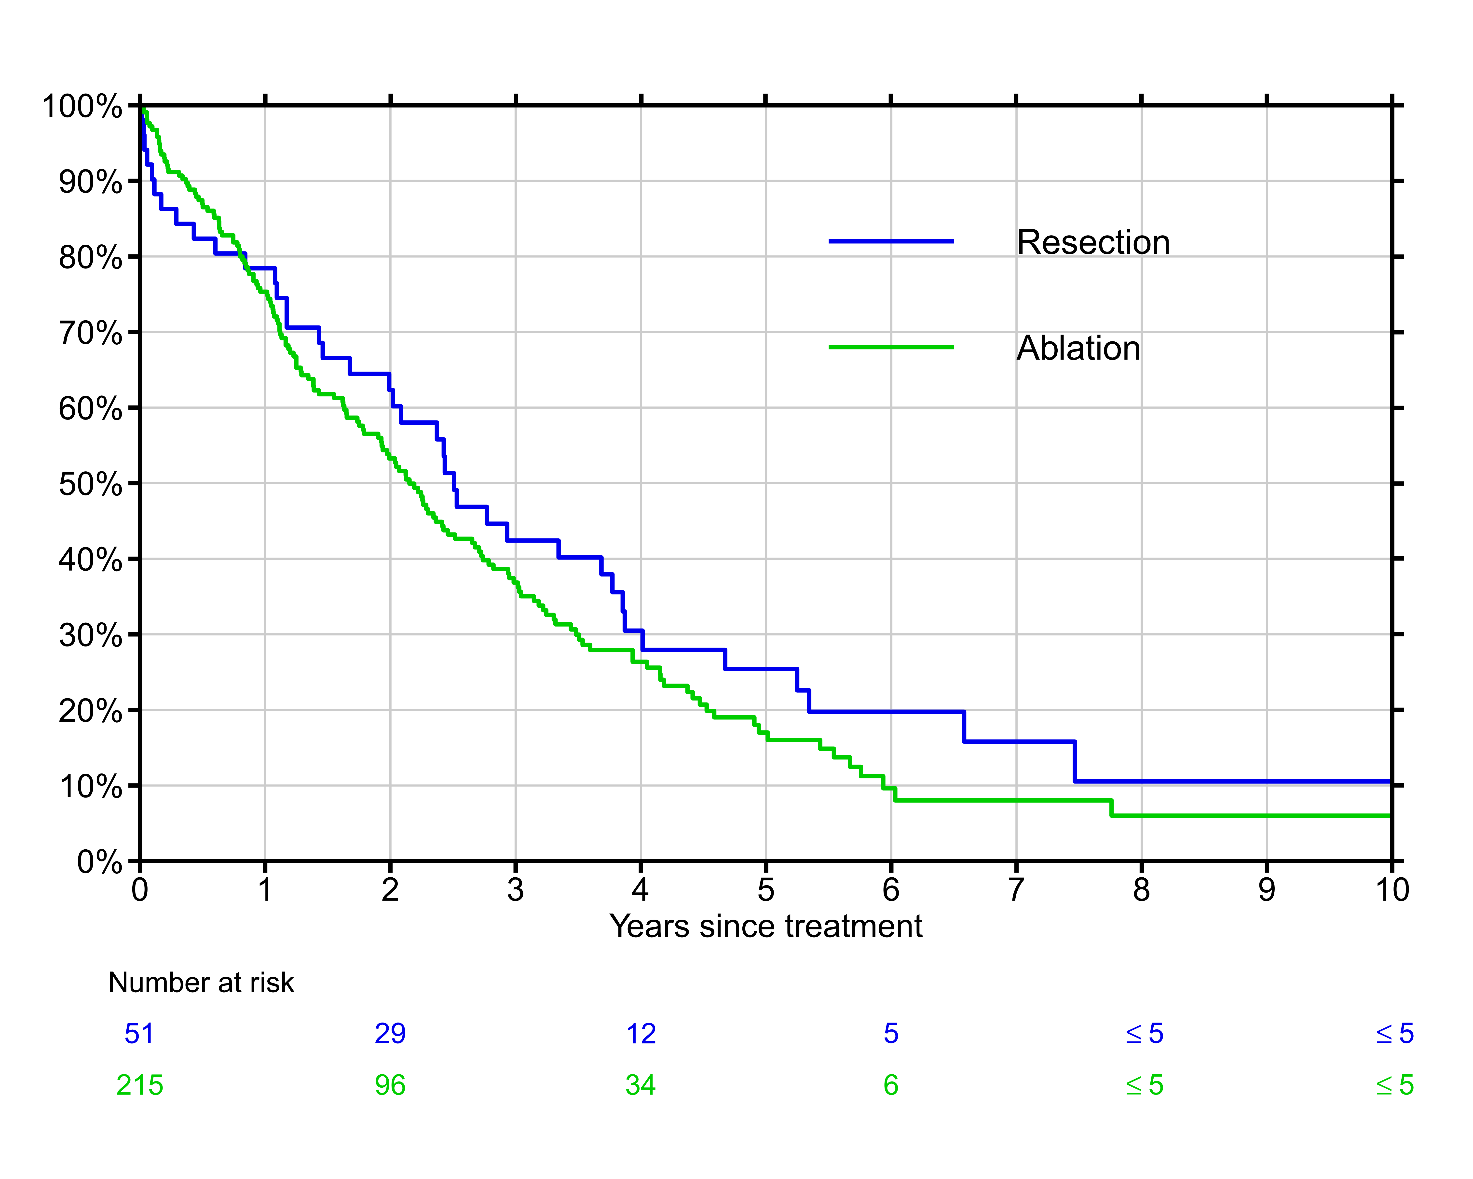
**

Supplementary Fig. S2**.** The average number of CT and MR liver scans received by patients in the resection (top) and ablation (bottom) cohorts per person-year per year
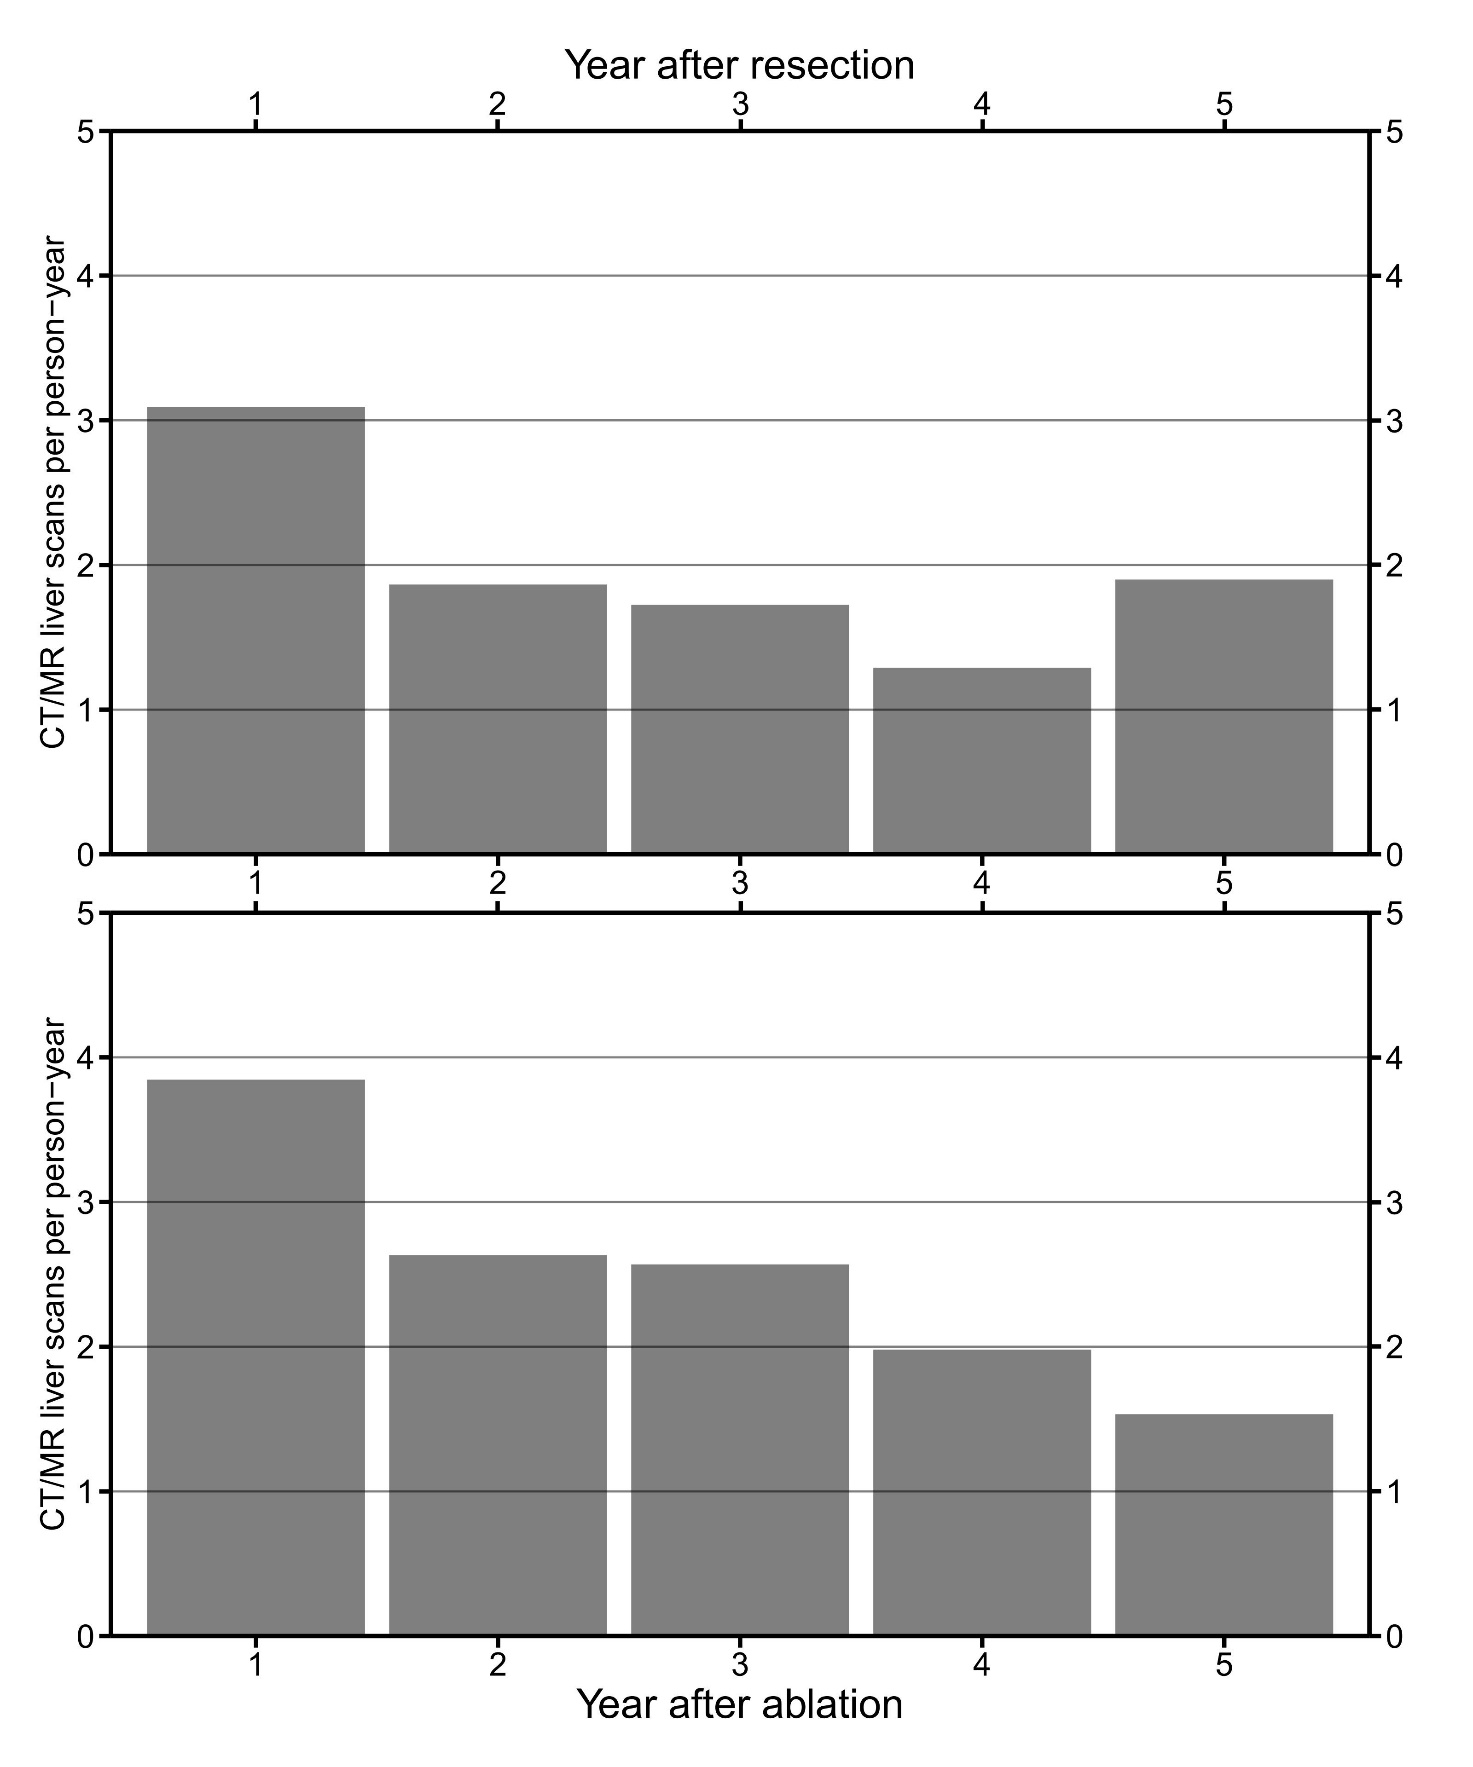


Supplementary Table S1**.** List of codes used to define the study population and treatment cohorts.

| **Danish National Patient Registry** |  |  |  |
| --- | --- | --- | --- |
|  | **Diagnoses** |  |  |
|  |  | Hepatocellular carcinoma | ICD-10: C22.0x |
|  |  | Cirrhosis due to alcohol-related liver disease | ICD-10: K70.3x, ICD-8: 571.0x |
|  |  | Ascites | ICD-10: R18x |
|  |  | Spontaneous bacterial peritonitis | ICD-10: K65.8I |
|  |  | Hepatorenal syndrome | ICD-10: K76.7 |
|  |  | Variceal bleeding | ICD-10: I85.0, I86.4A |
|  | **Surgical procedures** |  |  |
|  |  | Liver transplantation | NCSP: JJC 00, JJC 10, JJC 20, JJC 30, JJC 40 |
|  |  | Liver resection | NCSP: JJB xx, JJA 40, JJA 41 |
|  |  | Ablation of pathological liver tissue | NCSP: JJA 43x, JJA 44, TJJ 10 |
|  |  | Transarterial chemoembolization (TACE) or selective internal radiation therapy (SIRT) | NCSP: PCT 20; DCT: WGG2A, WHA110, WHA102 |
|  |  | Treatment of esophageal varices | NCSP: JCA 20, JCA 22, JCA 32 |
|  |  | Ascites drainage | NCSP: TJA 10x |
|  | **Non-surgical treatments** |  |  |
|  |  | Treatment with Sorafenib | DCT: WHA407 |
|  |  | Treatment with Regorafenib | DCT: WHA422 |
|  |  | External beam radiation therapy | DCT: WGC22 |
|  |  | Best supportive care | DCT: XB xx |
|  | **Referrals** |  |  |
|  |  | Referral to oncology or palliative medicine | Hospital department-classification: 022, 014 |
| **Danish Cancer Register** |  |  |  |
|  | **Diagnoses** |  |  |
|  |  | Hepatocellular carcinoma | ICD-10: C22.0x |
|  | **TNM codes** |  |  |
|  |  | TNM-T | ICD-10: AZCD13x-AZCD16x, AZCD19, AZCE13x-AZCE16x, AZCE19 |
|  |  | TNM-N | ICD-10: AZCD30x-AZCD33x, AZCD39, AZCE30x-AZCE33, AZCE39 |
|  |  | TNM-M | ICD-10: AZCD40x-AZCD41x, AZCD49, AZCE40x-AZCE41x, AZCE49 |

Abbreviations: ICD-10, International Classification of Diseases - 10th revision; ICD-8, International Classification of Diseases – 8th revision; NCSP, NOMESCO Classification of Surgical Procedures; DCT, Danish Classification of Therapies.

Supplementary Table S2**.** Causes of death of all deceased patients in the resection and ablation cohorts. Cells with five or less patients have been omitted to ensure patient anonymity.

|  | **Number of patients (% of all deaths)** | | |
| --- | --- | --- | --- |
| **Cause of death** | **Total** | **Resection** | **Ablation** |
| HCC | 113 (56.8) | 21 (53.9) | 91 (57.5) |
| Liver cirrhosis complication, not due to HCC | 36 (18.1) | 5 (12.8) | 31 (19.4) |
| Infection | 19 (9.6) | 6 (15.4) | 13 (8.1) |
| Cardiovascular disease | 16 (8.0) | - | - |
| Other cause | 9 (4.5) | - | - |
| Unknown cause (ICD-10: R99) | 6 (3) | - | - |
